# Supplementary material
Source: publisher figshare collection journal article supplement (https://rs.figshare.com/ndownloader/files/12800759)
Supplement: Supplementary file 1 [file 12800759]

## Sheet: Sheet1
Data to reproduce the curves shown in Figure 2. Thermodynamic data necessary to compute these models are provided in Table 1.
P (GPa)	(Fe^3+/Fe_T)_low P	(Fe^3+/Fe_T)_high P
0.0001	0.014964	0.00441792
1	0.0113582	0.00391341
2	0.00891338	0.00362769
3	0.0071731	0.00346134
4	0.00588949	0.00336824
5	0.00491373	0.00332407
6	0.00415592	0.00331482
7	0.00355626	0.00333199
8	0.00307421	0.00336989
9	0.00268144	0.00342497
10	0.00235764	0.00349467
11	0.00208792	0.00357719
12	0.0018612	0.00367131
13	0.00166903	0.00377611
14	0.00150493	0.00389097
15	0.00136385	0.00401544
16	0.0012418	0.00414922
17	0.00113562	0.00429212
18	0.00104274	0.00444402
19	0.000961107	0.00460488
20	0.000889026	0.00477472
21	0.000825106	0.00495359
22	0.000768196	0.00514158
23	0.000717336	0.00533881
24	0.00067172	0.00554541
25	0.000630672	0.00576157
26	0.000593616	0.00598747
27	0.000560063	0.00622329
28	0.000529595	0.00646927
29	0.000501853	0.00672563
30	0.000476529	0.0069926
31	0.000453353	0.00727044
32	0.000432094	0.00755941
33	0.000412549	0.00785976
34	0.000394541	0.00817178
35	0.000377914	0.00849575
36	0.000362531	0.00883195
37	0.000348274	0.00918068
38	0.000335034	0.00954223
39	0.000322717	0.00991691
40	0.000311239	0.010305
41	0.000300525	0.0107069
42	0.000290507	0.0111228
43	0.000281127	0.0115531
44	0.000272329	0.0119981
45	0.000264065	0.012458
46	0.000256292	0.0129334
47	0.00024897	0.0134243
48	0.000242064	0.0139313
49	0.00023554	0.0144545
50	0.00022937	0.0149943
